# Supplementary material
Source: PubMed Central journal article supplement (PMC2783487)

**Supplementary Fig. S1.** Erlotinib inhibits KPL-4 cell proliferation through the ERK pathway. *A*, KPL-4 cells were treated with control siRNA or ERK siRNA for 72 h. Western blot analysis was performed to determine the expression level of ERK after siRNA knockdown. *B*, Beginning 72 h after siRNA knockdown, KPL-4 cells were treated with the indicated concentrations of erlotinib

for another 72 h. Proliferation-inhibitory effects of erlotinib were quantified by WST-1 assay. Viability of ERK-siRNA-knockdown cells was compared with that of control-siRNA-treated cells.

**Supplementary Fig. S2.** Erlotinib inhibits IBC cell proliferation not through the Akt pathway. SUM149 cells were treated with the PI3K inhibitor LY29004 (10  $\mu$ M) alone, erlotinib (1  $\mu$ M) alone, or the combination of LY29004 and erlotinib for 72 h. Proliferation-inhibitory effects were quantified by WST-1 assay. Viability of drug-treated cells was compared with that of untreated cells.

Type of file: figure

Label: 7

Filename: figure\_7.ppt

# Supplementary Figure 1

**A**

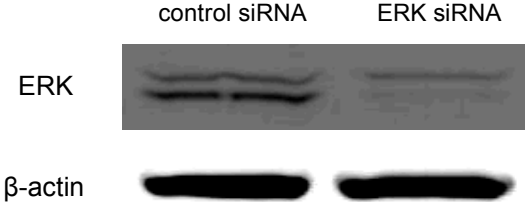

**B**

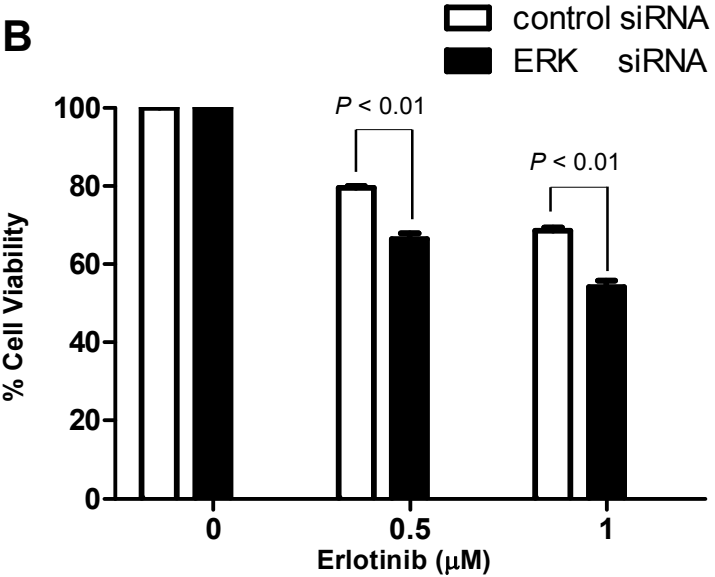

Type of file: figure

Label: 8

Filename: figure\_8.ppt

# Supplementary Figure 2

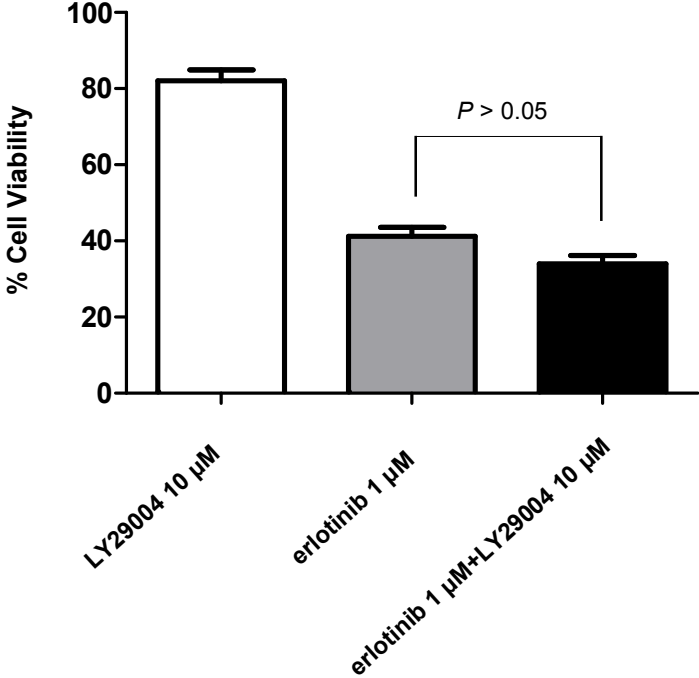

Supplement: NIHMS133467-supplement-01.pdf [file NIHMS133467-supplement-01.pdf]
